# Supplementary material
Source: PubMed Central journal article supplement (PMC6129206)
Supplement: NIHMS978402-supplement-1.pdf [file NIHMS978402-supplement-1.pdf]

# SUPPLEMENTARY INFORMATION

Table 1 | Retrospective Study: Patient and Control Characteristics

| Characteristics | No. of controls (%) | No. of patients (%) |
|-----------------|---------------------|---------------------|
|                 | N = 46              | N = 300             |
| Age             |                     |                     |
| Median          | 62.5                | 66                  |
| Range           | 38-83               | 21-91               |
| Sex             |                     |                     |
| Male            | 28 (61)             | 162 (54)            |
| Female          | 18 (39)             | 138 (46)            |
| Steroid status  |                     |                     |
| Naive           | 46 (100)            | 187 (63)            |
| Experienced     | 0 (0)               | 97 (32)             |
| Unknown         | 0 (0)               | 16 (5)              |

Table 2 | Prospective Study: Patient and Control Characteristics

| Characteristics | No. of controls (%) | No. of patients (%) |
|-----------------|---------------------|---------------------|
|                 | N = 13              | N = 15              |
| Age             |                     |                     |
| Median          | 68                  | 56                  |
| Range           | 41-86               | 30-75               |
| Sex             |                     |                     |
| Male            | 7 (54)              | 11 (73)             |
| Female          | 6 (46)              | 4 (27)              |

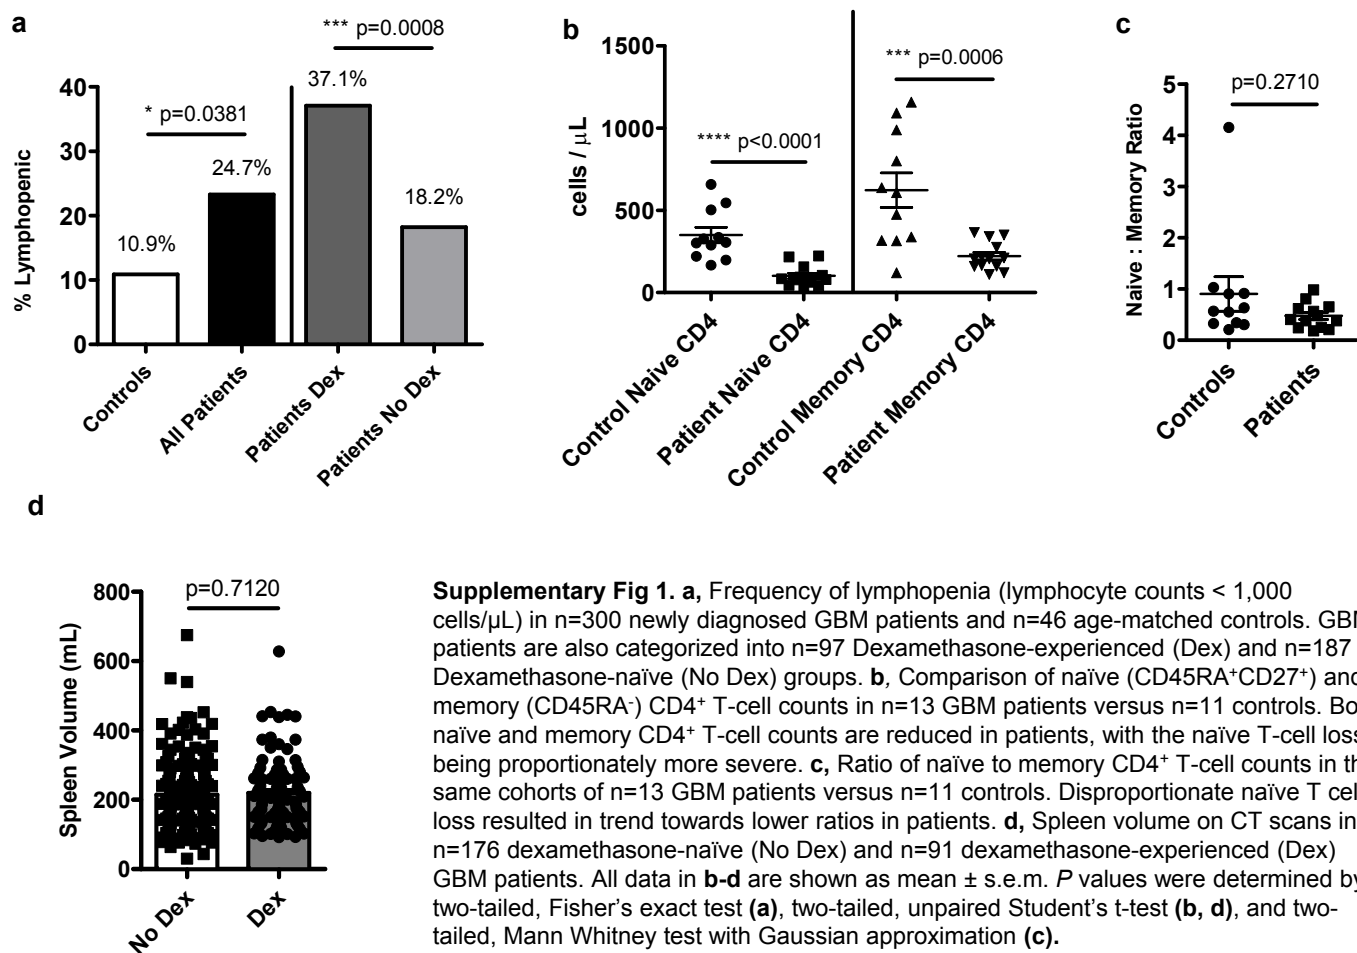

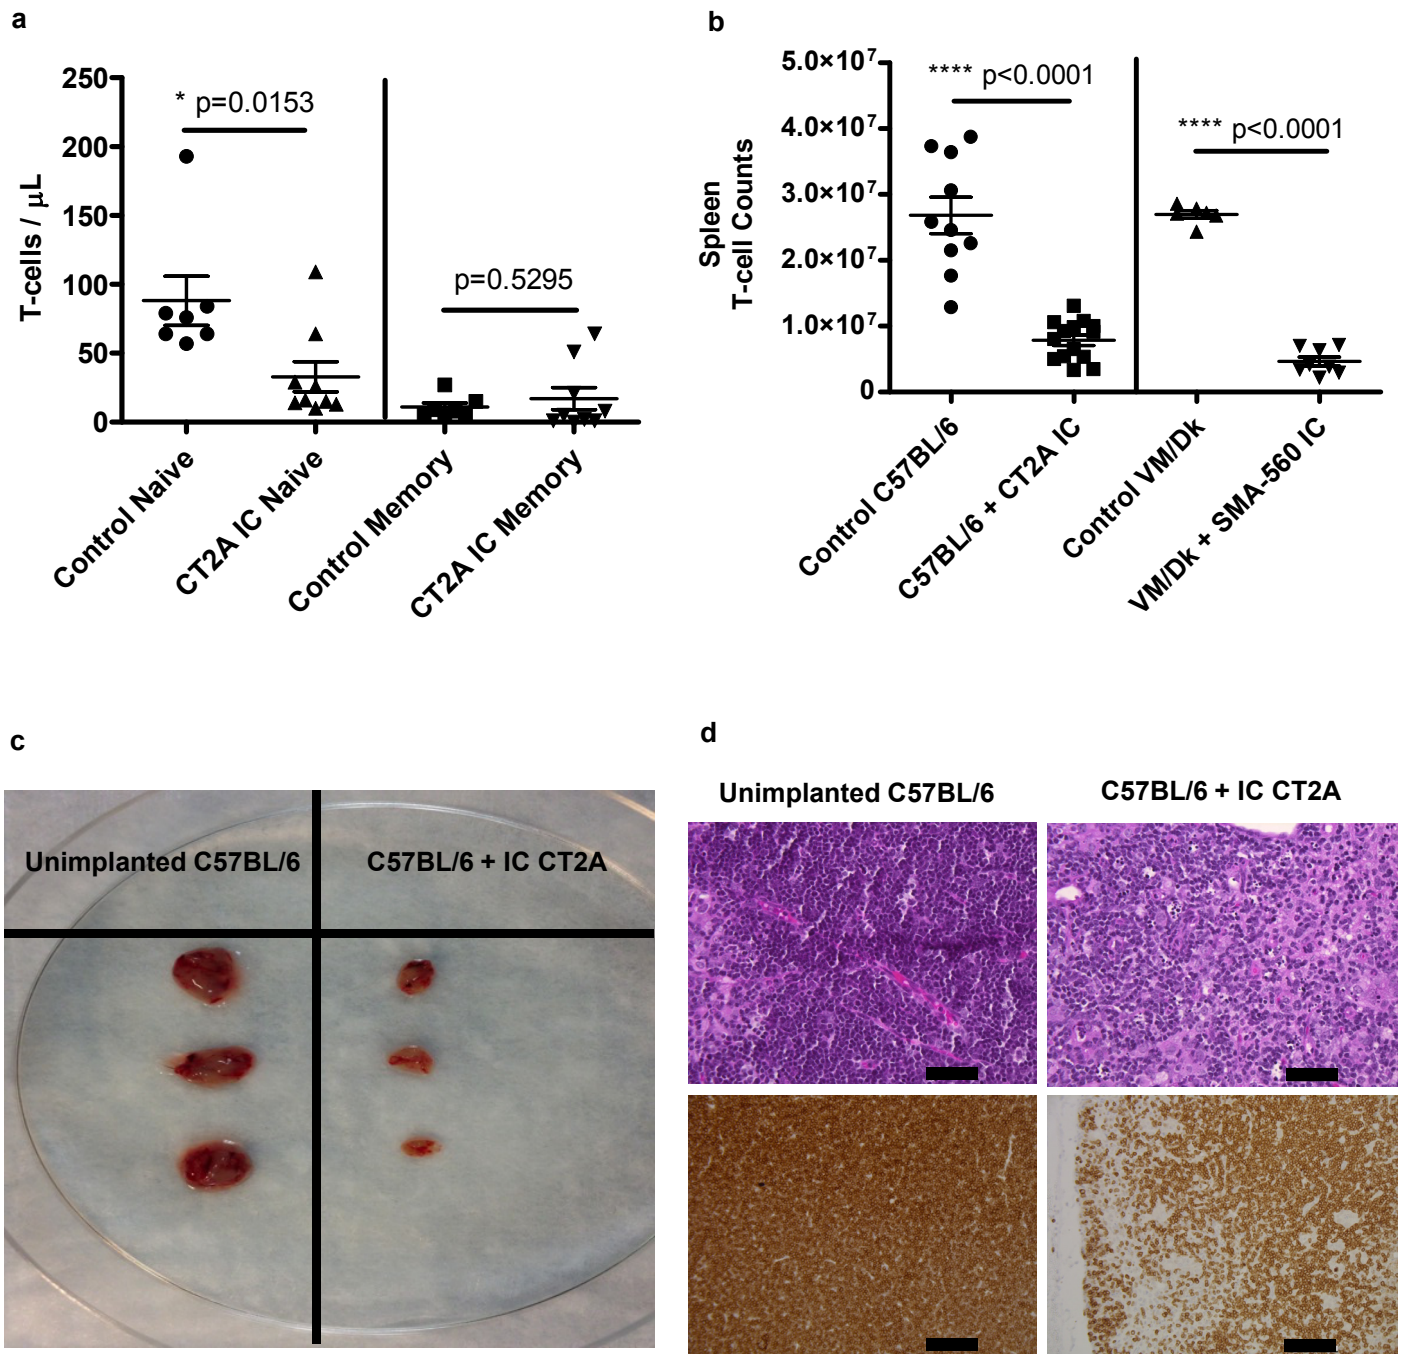

**Supplementary Fig. 2.** **a**, Blood naïve ( $\text{CD44}^-\text{CD62L}^+$ ) and memory ( $\text{CD44}^+\text{CD62L}^+$ ) T-cell counts depicted for  $n=7$  control C57BL/6 and  $n=9$  IC CT2A IC mice. **b**, Spleen T-cell counts in  $n=10$  control C57BL/6 and  $n=6$  control VM/Dk mice or  $n=14$  IC CT2A glioma-bearing C57BL/6 and  $n=8$  IC SMA-560 glioma-bearing VM/Dk mice. Data in **a-b** are shown as mean  $\pm$  s.e.m.  $P$  values were determined by two-tailed, unpaired Student's  $t$ -test. **c**, Gross image depicting thymuses taken from unimplanted or IC CT2A glioma-bearing C57BL/6 mice. **d**, H&E staining (upper panel) or IHC for CD3 (lower panel) of FFPE thymus taken from unimplanted or IC CT2A glioma-bearing C57BL/6 mice. Histopathologic examination of thymus from IC CT2A mice showed loss of normal cortico-medullary architecture. These findings accompanied marked organ lymphopenia and lymphoid necrosis. IHC confirmed thymus of IC CT2A mice has marked T-cell lymphopenia, for H&E, scale bar =  $50\ \mu\text{m}$ ; for IHC, scale bar =  $200\ \mu\text{m}$ . All data in **a-d** are representative findings from one of at least three independently repeated experiments with similar results. Both blood draw (**a**) and spleen/thymus harvest (**b-d**) were performed at 18 days following tumor implantation.

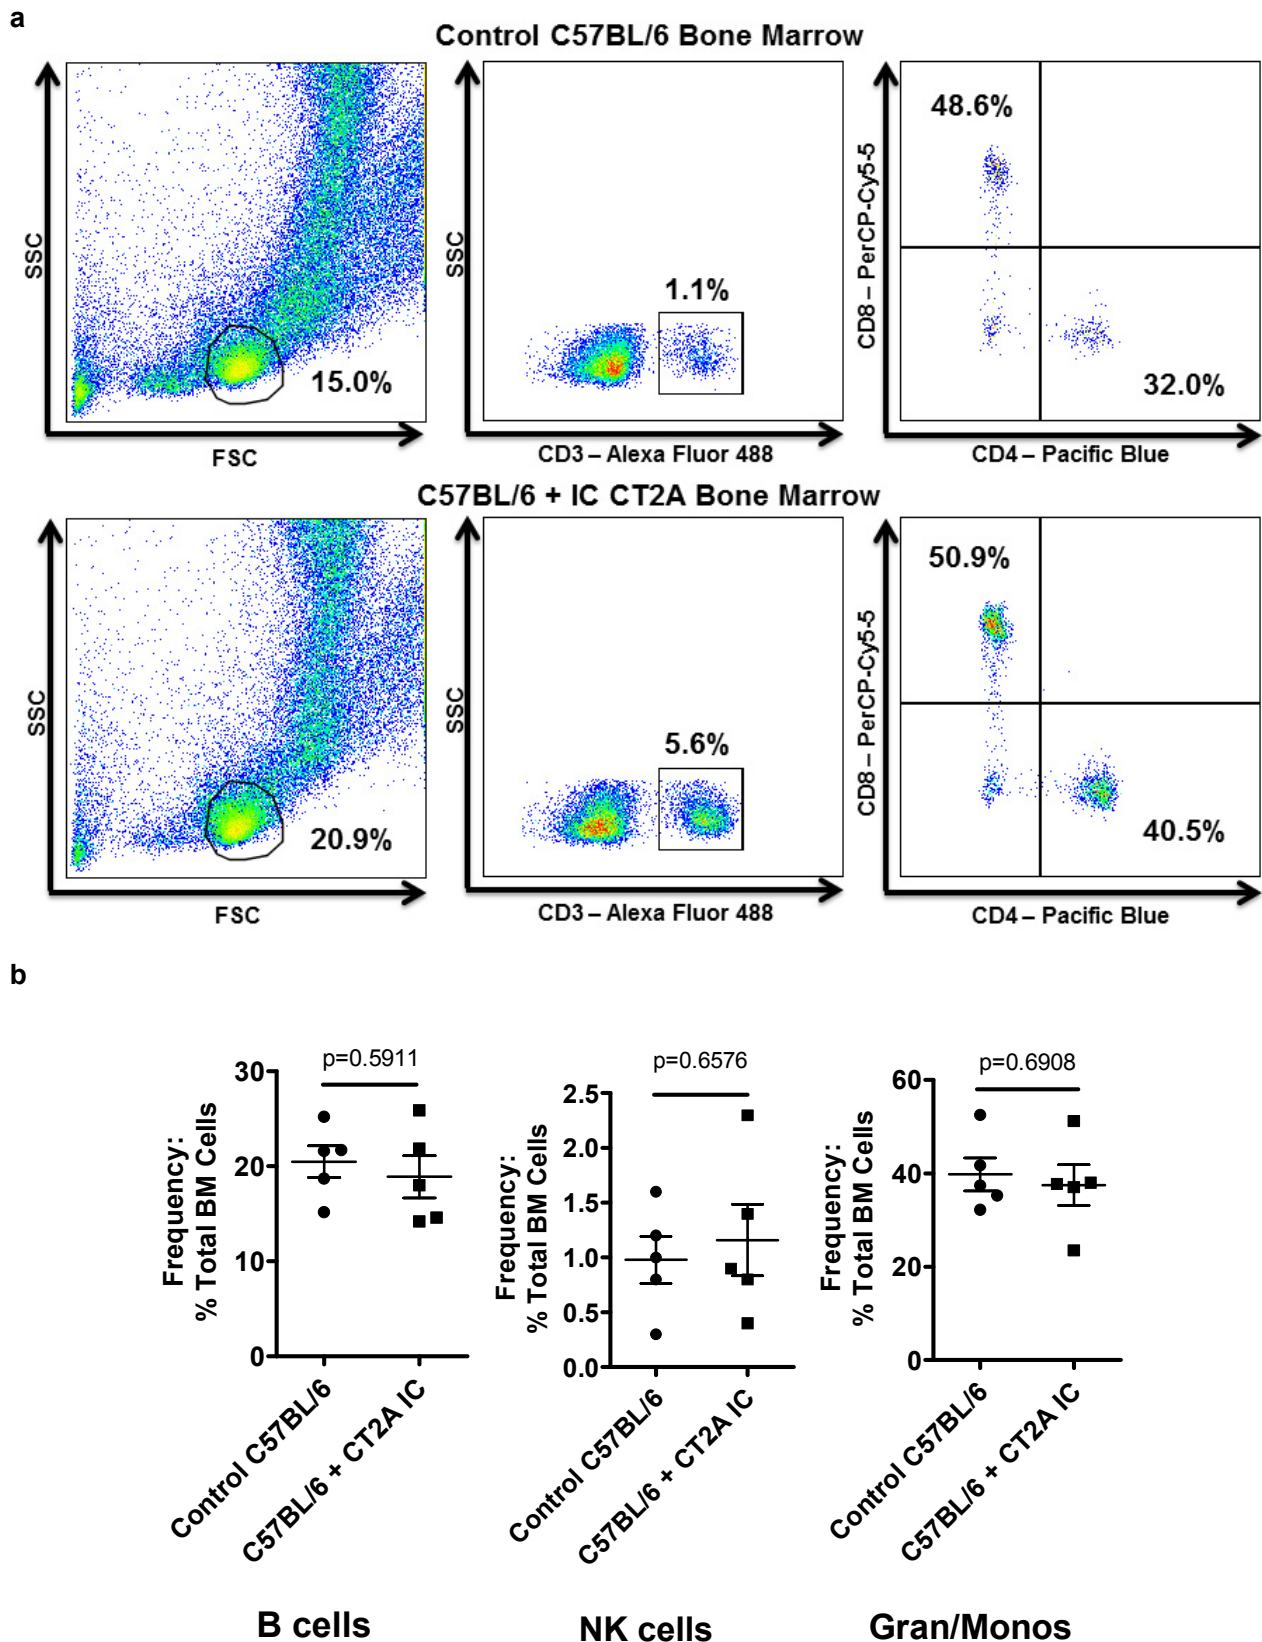

**Supplementary Fig. 3. a**, Sample flow cytometry plot examining bone marrow T-cells in control C57BL/6 mice (top), or the same mice bearing IC CT2A (bottom). **b**, Frequency of additional leukocyte populations in the bone marrow of  $n=5$  control C57BL/6 or  $n=3$  IC CT2A glioma-bearing C57BL/6 mice. Data in **a** are representative findings from one of at least three independently repeated experiments with similar results. Data in **b** are cumulative results from two experiments. Data in **b** are shown as mean  $\pm$  s.e.m.  $P$  values were determined by two-tailed, unpaired Student's  $t$ -test.

c

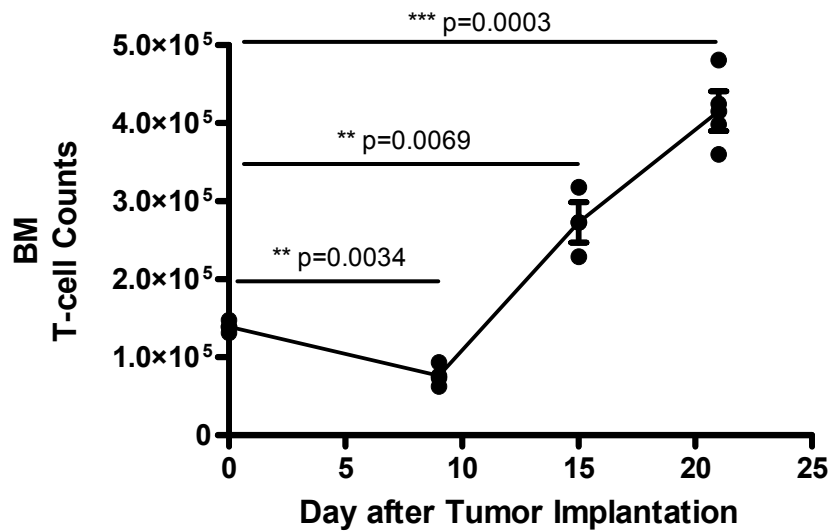

d

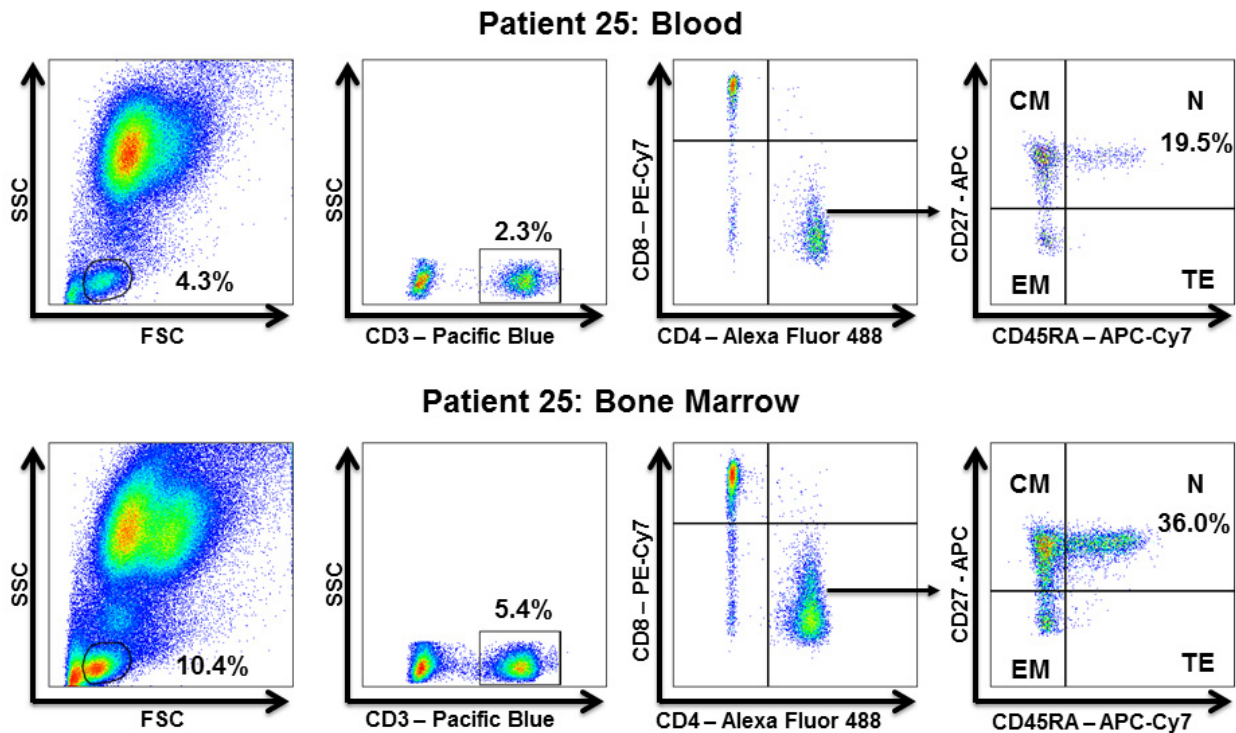

**Supplementary Fig. 3. (Cont.)** c, Time course of T-cell accumulation in the bone marrow of mice bearing IC CT2A after tumor implantation. Bone marrow were harvest from n=3 IC CT2A glioma mice on day 0, 9, 15 and n=4 IC CT2A glioma mice on day 21 after tumor implantation. Data in c are representative findings from one of at least three independently repeated experiments with similar results. Data in c are shown as mean  $\pm$  s.e.m. *P* values were determined by two-tailed, unpaired Student's t-test. d, Sample flow cytometry plot examining bone marrow T-cells. The relative proportions of central memory (CM), naïve (N), effector memory (EM), and terminal effector (TE) populations in a patient blood (top) and bone marrow (bottom). CD4<sup>+</sup> T-cells are depicted. Similar results were obtained for CD8<sup>+</sup> T-cells.

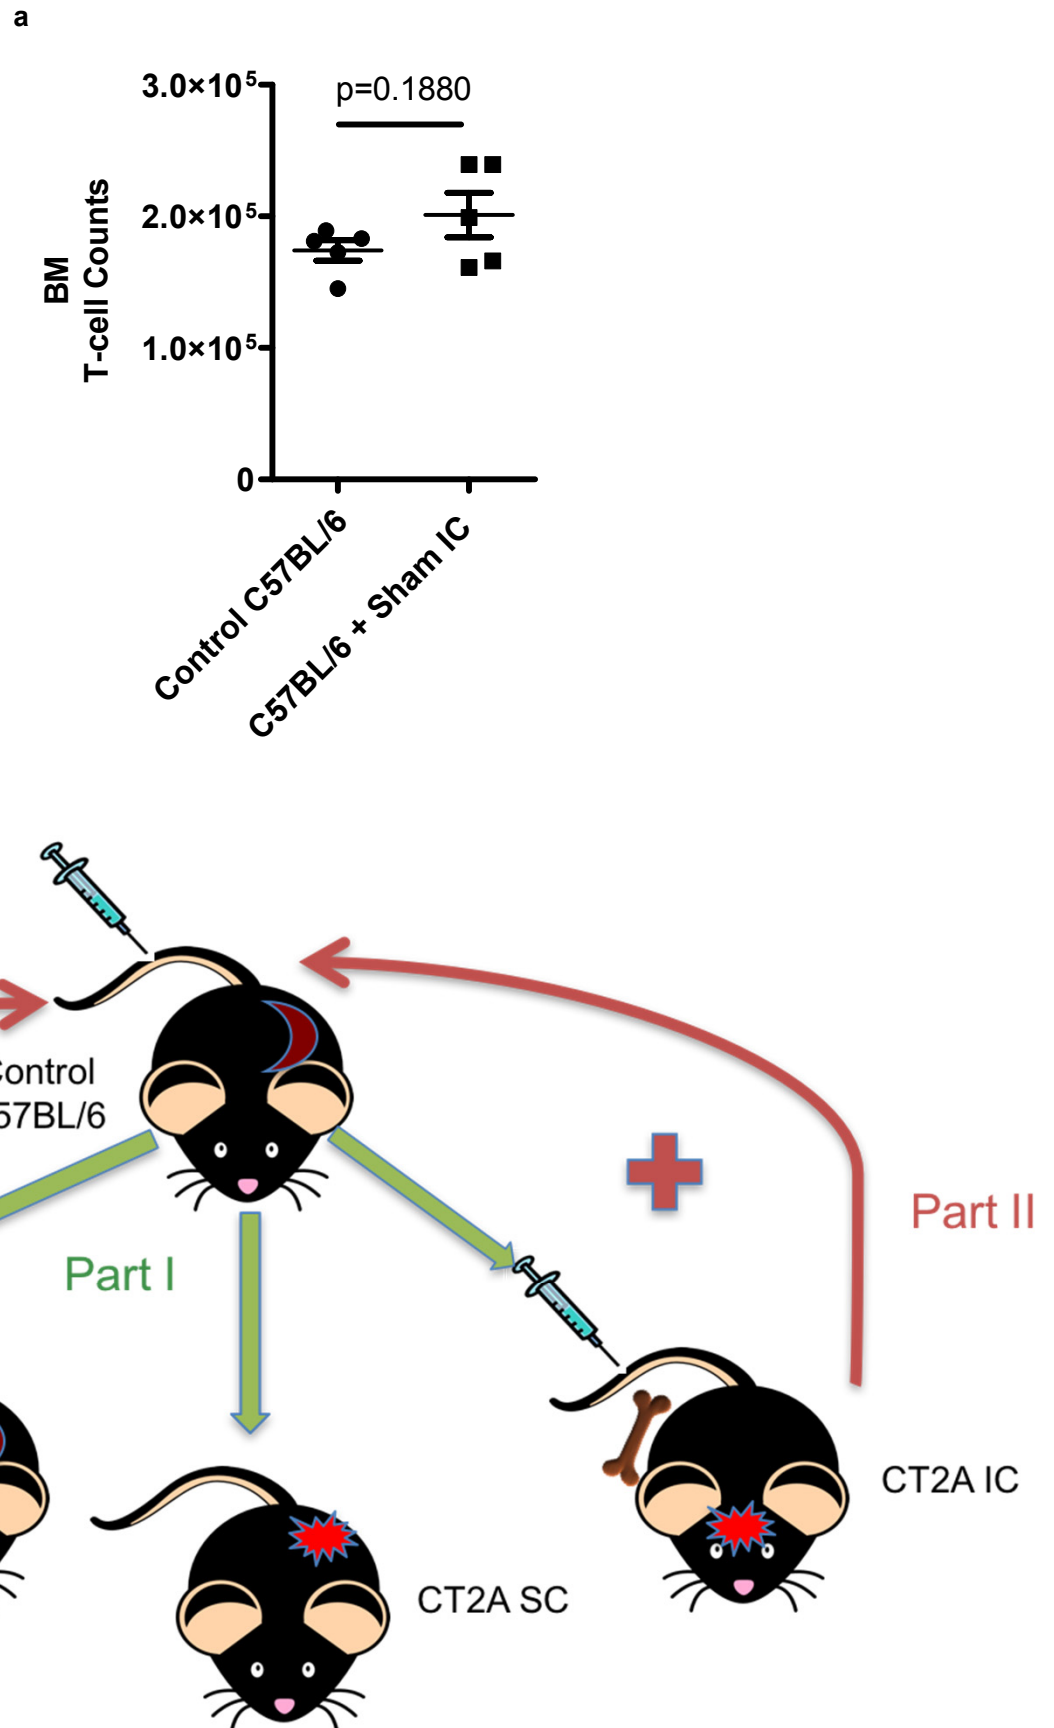

**Supplementary Fig. 4. a**, Bone marrow T-cell counts were compared among  $n=5$  control un-operated C57BL/6 mice and  $n=5$  C57BL/6 mice receiving sham IC injections of a saline/methylcellulose mixture. No difference in bone marrow T-cell counts was observed. Data depicted are from Day 18 post-injection. Data in **a** are representative findings from one of two independently repeated experiments with similar results. Data are shown as mean  $\pm$  s.e.m.  $P$  values were determined by two-tailed, unpaired Student's t-test. **b**, Pictorial schematic for the experiments producing the data depicted in Figs 4 **d-f**

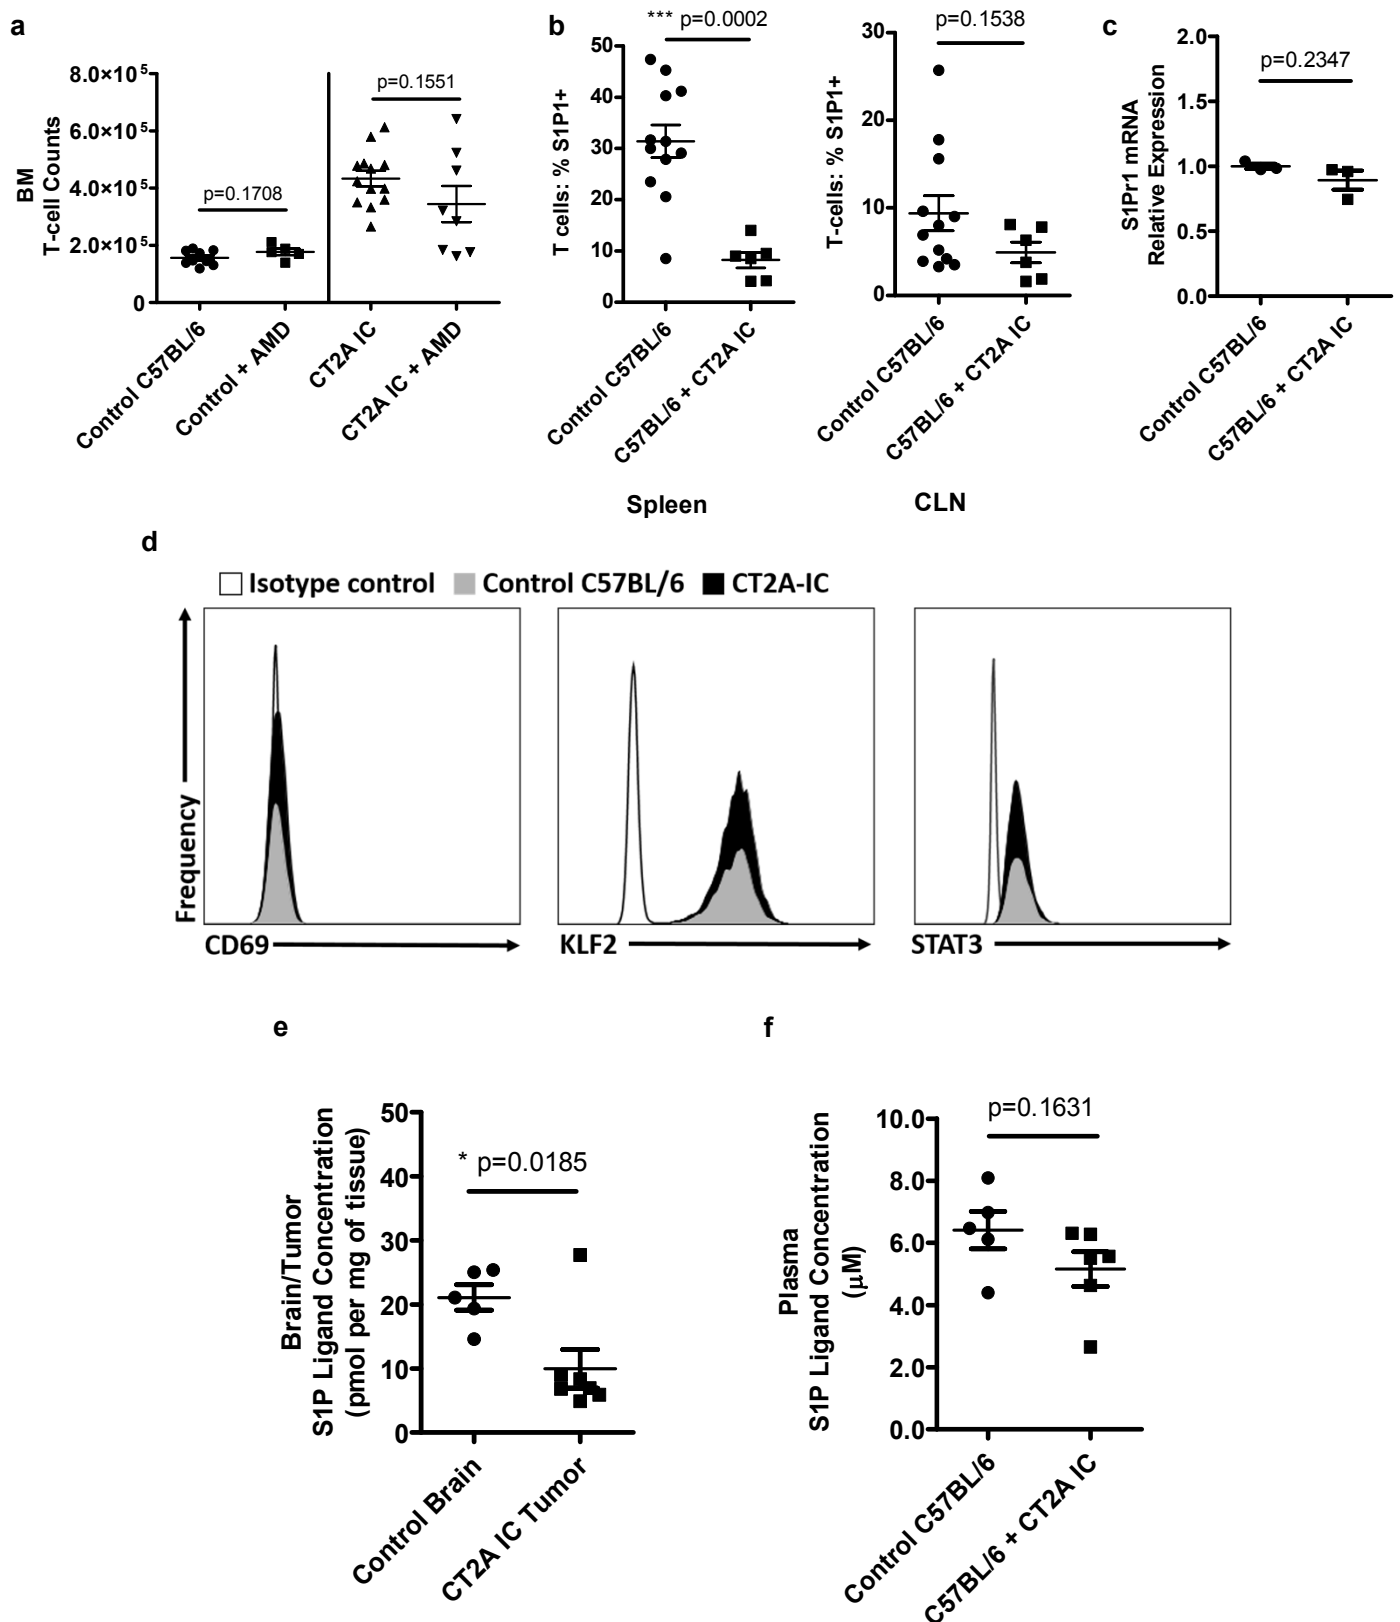

**Supplementary Fig. 5.** **a**, Bone marrow T-cell counts are shown for  $n=9$  control tumor-naïve C57BL/6 and  $n=13$  IC CT2A-bearing mice, or  $n=5$  control tumor-naïve C57BL/6 and  $n=8$  IC CT2A-bearing mice administered the CXCR4 antagonist AMD3100 (AMD). **b**, Frequency of S1P1<sup>+</sup> T-cell populations in the spleen (left) and cervical lymph nodes (CLN) (right) of  $n=12$  control C57BL/6 or  $n=6$  CT2A IC mice. **c**, S1Pr1 mRNA expression levels in T-cells sorted from spleens of  $n=3$  control C57BL/6 or  $n=3$  CT2A IC mice assessed by qRT-PCR and normalized to GAPDH expression. **d**, Histograms showing expression levels of CD69, KLF2, and STAT3 in the T-cells of bone marrow of control C57BL/6 (gray) or CT2A IC (black) mice assessed by RNA prime flow. Data in **a-d** are representative findings from one of two independently repeated experiments with similar results. **e**, Concentration of S1P ligand in the plasma of  $n=5$  control C57BL/6 or  $n=6$  IC CT2A-bearing mice, as assessed by LC-MS/MS. **f**, Concentration of S1P ligand in the brain or brain tumor of  $n=5$  control C57BL/6 or  $n=7$  IC CT2A-bearing mice, as assessed by LC-MS/MS. Data in **f** are normalized to tissue weight. Data in **a-c**, **e**, **f** are shown as mean  $\pm$  s.e.m. All  $P$  values were determined by two-tailed, unpaired Student's  $t$ -test.

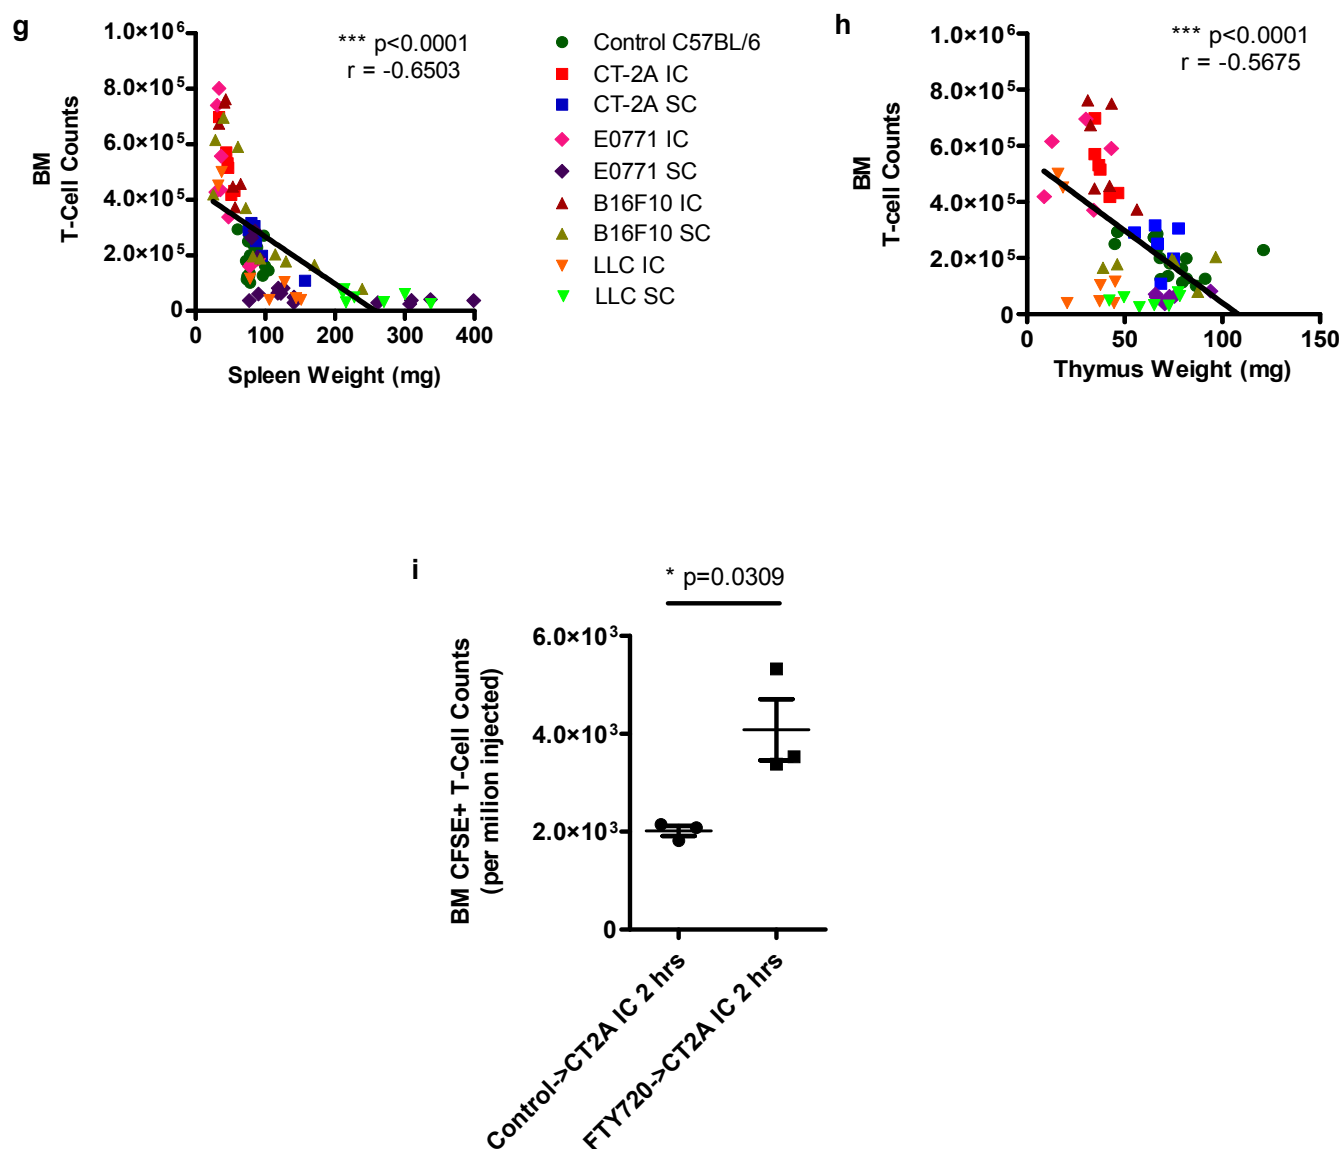

**Supplementary Fig. 5. (Cont.) g,h.** Negative correlation between bone marrow T-cell counts and either spleen (**g**) or thymus (**h**) weight across IC and SC murine tumor models. Data in **g** were obtained from  $n=6$  IC CT2A,  $n=9$  IC E0771,  $n=6$  IC B16F10,  $n=7$  IC LLC,  $n=6$  SC CT2A,  $n=10$  SC E0771,  $n=11$  SC B16F10, and  $n=7$  SC LLC tumor-bearing mice.  $N=21$  control C57BL/6 were also included. Data in **h** were obtained from  $n=6$  IC CT2A,  $n=5$  IC E0771,  $n=6$  IC B16F10,  $n=7$  IC LLC,  $n=6$  SC CT2A,  $n=7$  SC E0771,  $n=6$  SC B16F10, and  $n=7$  SC LLC tumor-bearing mice.  $N=21$  control C57BL/6 were also included. Data in **g**, **h** are cumulative results from a minimum of two experiments with each tumor type. Two-tailed,  $p$  values and Pearson coefficients for **g**, **h** are depicted. **i**, Accumulation of adoptively transferred CFSE-labeled T-cells in the bone marrow of CT2A IC recipients that were treated with either vehicle control ( $n=3$  recipient mice) or FTY720 ( $n=3$  recipient mice) 2 hours prior to receiving transfers. Transferred cells were splenocytes from control C57BL/6 donors. Data in **i** are shown as mean  $\pm$  s.e.m. The  $p$  value was determined by two-tailed, unpaired Student's  $t$ -test.

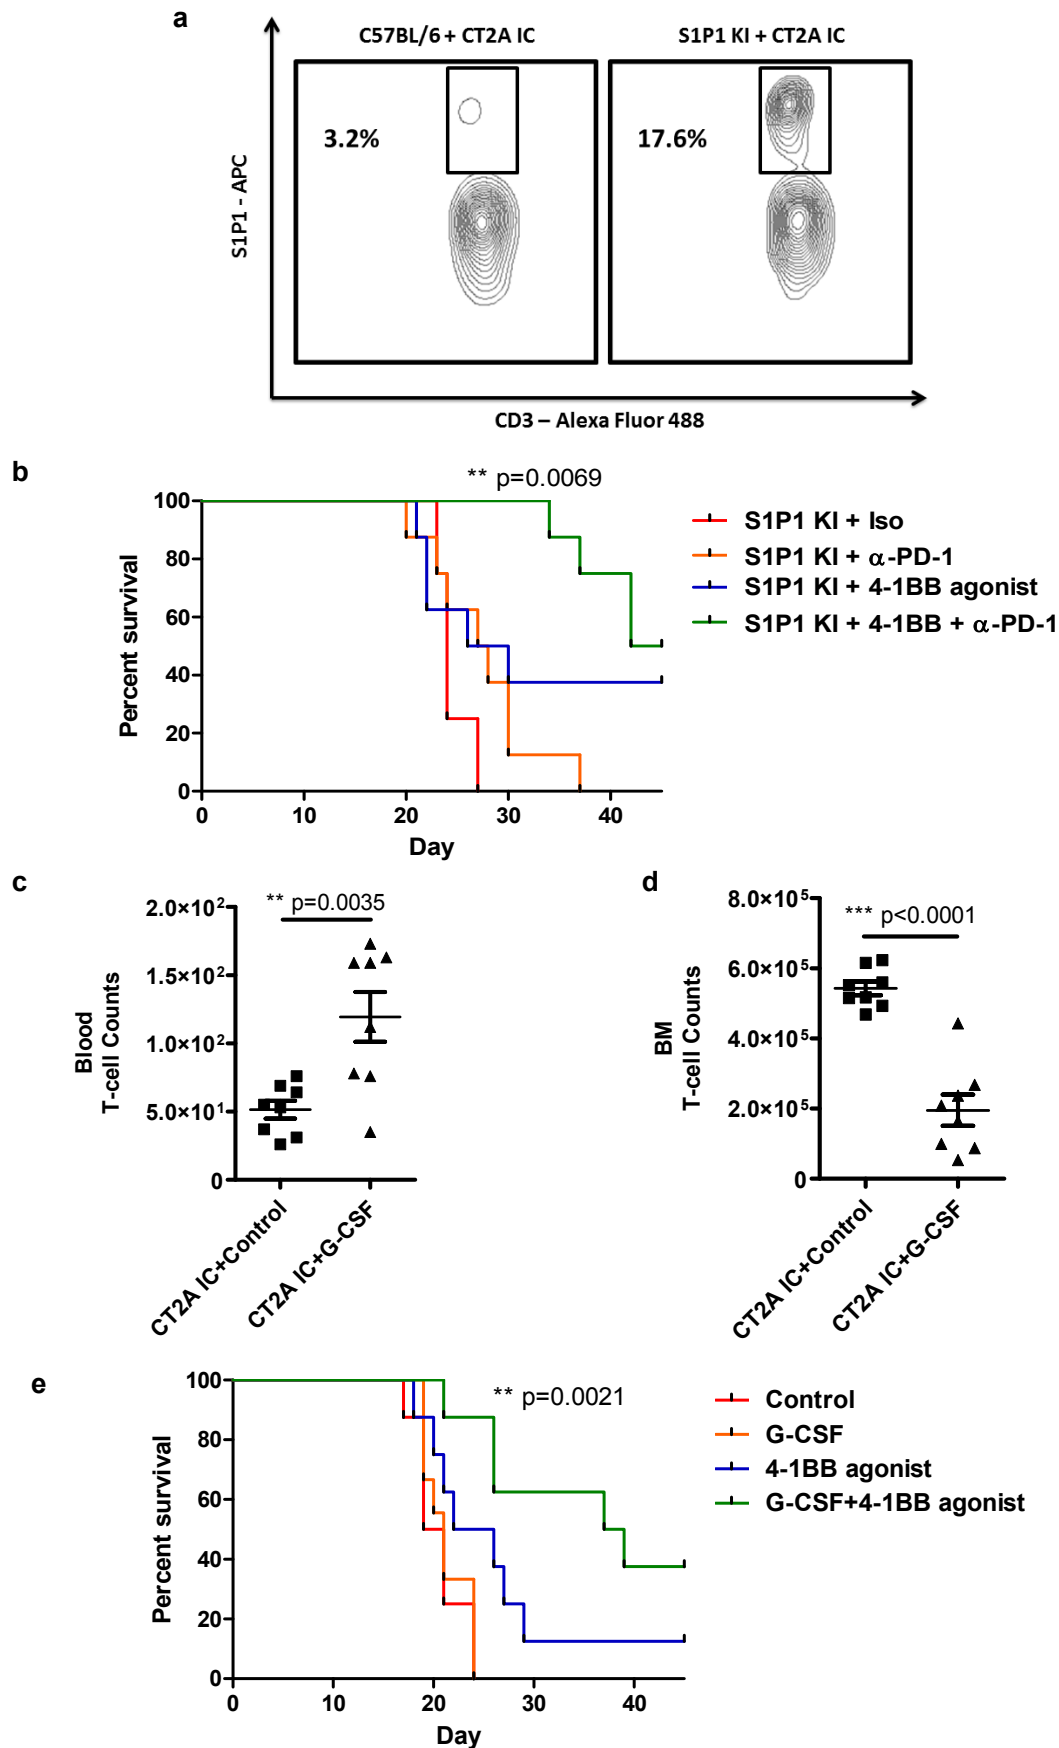

**Supplementary Fig. 6. a**, Representative flow cytometry plot depicting the frequency of S1P1 on the surface of T-cells in the bone marrow of C57BL/6 mice and S1P1 KI bearing IC CT2A tumor. **b**, S1P1 KI mice were implanted with IC CT2A tumors and treated with anti ( $\alpha$ )-PD-1, 4-1BB agonist, or the combination of both (n=8 per group). Bone marrow (**c**) and blood (**d**) T-cell counts in n=8 control mice and n=8 IC CT2A-bearing mice administered control treatment or G-CSF intraperitoneally every 3 days following tumor implantation (Days 3-18). Counts were assessed 18 days following tumor implantation. **e**, IC CT2A IC mice were administered G-CSF, 4-1BB agonist, or the combination regimen of both drugs (n=8 per group). All data in **a-e** are representative findings from one of two independently repeated experiments with similar results. Data in **c**, **d** are shown as mean  $\pm$  s.e.m. *P* values in **c**, **d** were determined by two-tailed, unpaired Student's *t*-test. Survivals in **b**, **e** were assessed by two-tailed generalized Wilcoxon test. *P* values for overall comparison are depicted.
